# Supplementary material for: Hexachlorobenzene-negative ion formation in electron attachment experiments
Source: Royal Society of Chemistry journal article supplement (doi:10.1039/d2cp01360f), 2022-01-01
Supplement: d2cp01360f1.pdf [file d2cp01360f1.pdf]

## Hexachlorobenzene negative ions formation in electron attachment experiments

S. Kumar <sup>1</sup>, F. Izadi <sup>2</sup>, M. Ončák <sup>2</sup>, P. Limão-Vieira <sup>1,\*</sup> and S. Denifl <sup>2,\*</sup>

<sup>1</sup> Atomic and Molecular Collisions Laboratory, CEFITEC, Department of Physics, Universidade NOVA de Lisboa, 2829-516 Caparica, Portugal

<sup>2</sup> Institute for Ion Physics and Applied Physics and Center for Biomolecular Sciences (CMBI), University of Innsbruck, Technikerstrasse 25, A-6020 Innsbruck, Austria

### Figure caption

Fig. S1. Electron impact ionisation (70 eV) of hexachlorobenzene yielding  $\text{Cl}^+$ ,  $\text{Cl}_2^+$ ,  $\text{C}_6\text{Cl}_4^+$ ,  $\text{C}_6\text{Cl}_5^+$  and  $\text{C}_6\text{Cl}_6^+$  at 44, 48 and 54°C.

Fig. S2. Shape of several valence molecular orbitals (HOMO-1, HOMO, LUMO, LUMO+1) in  $\text{C}_6\text{Cl}_6$  of  $D_{6h}$  symmetry as calculated at the  $\omega\text{B97XD/aug-cc-pVDZ}$  level.

### Table caption

Table S1. Energies for selected reactions (in eV) after electron attachment to  $\text{C}_6\text{Cl}_6$ . The aug-cc-pVDZ basis set was employed for all calculations, CCSD values were single-point calculated in structures optimized at the  $\omega\text{B97XD/aug-cc-pVDZ}$  level, using the zero-point energy correction at the same level.

Table S2. Relative energy of  $^2\text{E}_{2u}$  and  $^2\text{A}_{1g}$  states in  $\text{C}_6\text{Cl}_6^-$  in the structure of  $\text{C}_6\text{Cl}_6$  optimized at the  $\omega\text{B97XD/aug-cc-pVDZ}$  level. The aug-cc-pVDZ basis set was used for the calculations.

Table S3. Experimental and calculated vertical electron affinity (VEA), adiabatic electron affinity (AEA) of chlorobenzene, 1,2-dichlorobenzene and hexachlorobenzene (in eV), calculated at the  $\omega\text{B97XD/aug-cc-pVDZ}$  level. Negative calculated electron affinities are not shown.

Fig. S1. Electron impact ionisation (70 eV) of hexachlorobenzene yielding  $\text{Cl}^+$ ,  $\text{Cl}_2^+$ ,  $\text{C}_6\text{Cl}_4^+$ ,  $\text{C}_6\text{Cl}_5^+$  and  $\text{C}_6\text{Cl}_6^+$  at 44, 48 and 54°C.

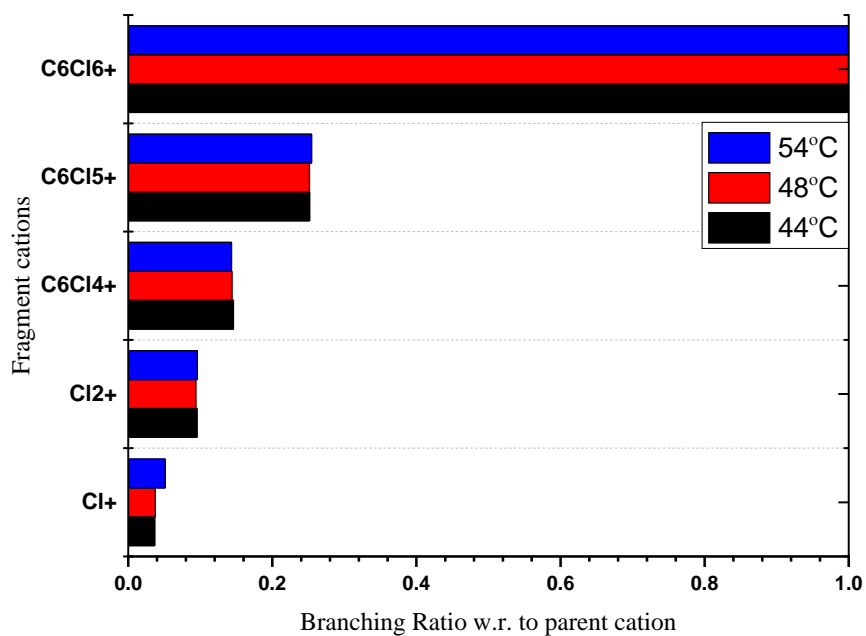

Fig. S2. Shape of several valence molecular orbitals (HOMO-1, HOMO, LUMO, LUMO+1) in  $C_6Cl_6$  of  $D_{6h}$  symmetry as calculated at the  $\omega$ B97XD/aug-cc-pVDZ level.

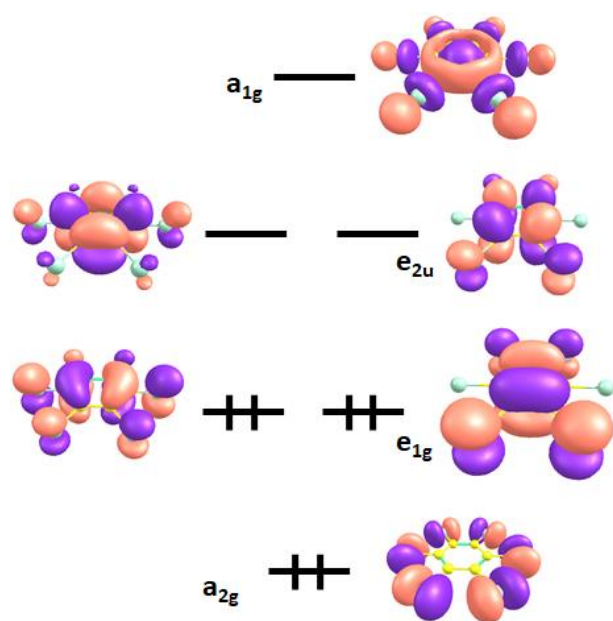

Table S1. Energies for selected reactions (in eV) after electron attachment to  $C_6Cl_6$ . The aug-cc-pVDZ basis set was employed for all calculations, CCSD values were single-point calculated in structures optimized at the  $\omega$ B97XD/aug-cc-pVDZ level, using the zero-point energy correction at the same level.

| reaction                                     | $\omega$ B97XD | B3LYP | CCSD// $\omega$ B97XD |
|----------------------------------------------|----------------|-------|-----------------------|
| $C_6Cl_6 + e^- \rightarrow C_6Cl_6^-$        | -1.07          | -1.33 | -0.92                 |
| $C_6Cl_6 + e^- \rightarrow Cl_2^- + C_6Cl_4$ | 1.72           | 1.10  | 1.97                  |
| $C_6Cl_6 + e^- \rightarrow C_6Cl_5^- + Cl$   | 0.85           | 0.52  | 0.77                  |
| $C_6Cl_6 + e^- \rightarrow C_6Cl_4^- + Cl_2$ | 2.13           | 1.66  | 2.38                  |
| $C_6Cl_6 + e^- \rightarrow C_6Cl_4^- + 2 Cl$ | 4.40           | 3.83  | 4.13                  |
| $C_6Cl_6 + e^- \rightarrow Cl^- + C_6Cl_5$   | 0.19           | -0.07 | 0.27                  |

Table S2. Relative energy of  ${}^2E_{2u}$  and  ${}^2A_{1g}$  states in  $C_6Cl_6^-$  in the structure of  $C_6Cl_6$  optimized at the  $\omega$ B97XD/aug-cc-pVDZ level. The aug-cc-pVDZ basis set was used for the calculations.

| active space         | CASSCF       |              | MRCI         |              |
|----------------------|--------------|--------------|--------------|--------------|
|                      | ${}^2E_{2u}$ | ${}^2A_{1g}$ | ${}^2E_{2u}$ | ${}^2A_{1g}$ |
| (5,5)                | 0.00         | 0.25         | 0.00         | 0.21         |
| (5,7)                | 0.00         | -0.03        | 0.00         | -0.05        |
| (5,8)                | 0.00         | 0.26         | 0.00         | 0.18         |
| (5,10)               | 0.00         | 0.19         | –            | –            |
| (5,13)               | 0.00         | 0.08         | –            | –            |
| (15,13) <sup>a</sup> | 0.00         | 0.25         | –            | –            |
| (25,18) <sup>a</sup> | 0.00         | 0.21         | –            | –            |

a) Active space breaks symmetry slightly, leading to splitting of the  ${}^2E_{2u}$  state of 0.18 meV and 1.7 meV for (15,13) and (25,18), respectively.

Table S3. Experimental and calculated vertical electron affinity (VEA), adiabatic electron affinity (AEA) of chlorobenzene, 1,2-dichlorobenzene and hexachlorobenzene (in eV), calculated at the  $\omega$ B97XD/aug-cc-pVDZ level. Negative calculated electron affinities are not shown.

|      | C <sub>6</sub> H <sub>5</sub> Cl | 1,2-C <sub>6</sub> H <sub>4</sub> Cl <sub>2</sub> | C <sub>6</sub> Cl <sub>6</sub> |
|------|----------------------------------|---------------------------------------------------|--------------------------------|
| VEA  | –                                | –                                                 | 0.27                           |
| AEA  | –                                | 0.18                                              | 1.07                           |
| Exp. | –0.14 <sup>1</sup>               | 0.08 <sup>1</sup>                                 | 0.98 <sup>1</sup>              |

**Cartesian coordinates (in Å) of structures optimized at the  $\omega$ B97XD/aug-cc-pVDZ level along with the zero-point corrected energy (in Hartree).**

C6C14-  
E = -2069.294225  
C -0.000000 0.672148 -2.082482  
C -0.000000 1.382052 -0.905654  
C 0.000000 0.702628 0.324202  
C -0.000000 -0.702628 0.324202  
C -0.000000 -1.382052 -0.905654  
C -0.000000 -0.672148 -2.082482  
Cl -0.000000 3.168853 -0.907502  
Cl 0.000000 1.574114 1.847714  
Cl -0.000000 -1.574114 1.847714  
Cl -0.000000 -3.168853 -0.907502

C6C14  
E = -2069.202861  
C 0.000000 0.621738 -1.970330  
C 0.000000 1.458657 -0.879796  
C 0.000000 0.712230 0.320838  
C -0.000000 -0.712230 0.320838  
C -0.000000 -1.458657 -0.879796  
C -0.000000 -0.621738 -1.970330  
Cl 0.000000 3.183251 -0.935863  
Cl 0.000000 1.564072 1.828553  
Cl -0.000000 -1.564072 1.828553  
Cl -0.000000 -3.183251 -0.935863

C6C15-  
E = -2529.565542  
C 0.000000 1.158586 -1.144654  
C -0.000000 0.000000 -1.887993  
C -0.000000 -1.158586 -1.144654  
C 0.000000 -1.211551 0.253282  
C 0.000000 0.000000 0.958613  
C 0.000000 1.211551 0.253282  
Cl 0.000000 -2.737463 -2.017917  
Cl 0.000000 -2.724947 1.143105  
Cl 0.000000 0.000000 2.706845  
Cl 0.000000 2.724947 1.143105  
Cl 0.000000 2.737463 -2.017917

C6C15  
E = -2529.452678  
C -0.000000 1.222216 -1.122382  
C 0.000000 0.000000 -1.737063  
C -0.000000 -1.222216 -1.122382  
C 0.000000 -1.222421 0.281727  
C -0.000000 -0.000000 0.975583  
C 0.000000 1.222421 0.281727  
Cl 0.000000 -2.678067 -2.061272

Cl 0.000000 -2.723913 1.139572  
Cl -0.000000 -0.000000 2.705559  
Cl 0.000000 2.723913 1.139572  
Cl 0.000000 2.678067 -2.061272

C6C16-  
E = -2989.776729  
C 1.211726 0.688049 -0.057280  
C 0.000000 1.398639 0.053689  
C -1.211726 0.688049 -0.057280  
C -1.211726 -0.688049 -0.057280  
C -0.000000 -1.398639 0.053689  
C 1.211726 -0.688049 -0.057280  
Cl -2.714003 1.595161 -0.358223  
Cl -2.714003 -1.595161 -0.358223  
Cl 0.000000 -3.048445 0.737931  
Cl 2.714003 -1.595161 -0.358223  
Cl 2.714003 1.595161 -0.358223  
Cl 0.000000 3.048445 0.737931

C6C16  
E = -2989.737535  
C 0.000000 1.400109 0.000000  
C -1.212530 0.700055 0.000000  
C -1.212530 -0.700055 0.000000  
C 0.000000 -1.400109 0.000000  
C 1.212530 -0.700055 0.000000  
C 1.212530 0.700055 0.000000  
Cl -2.709794 -1.564500 0.000000  
Cl 0.000000 -3.129001 0.000000  
Cl 2.709794 -1.564500 0.000000  
Cl 2.709794 1.564500 0.000000  
Cl -0.000000 3.129001 0.000000  
Cl -2.709794 1.564500 -0.000000

Cl2-  
E = -920.471346  
Cl 0.000000 0.000000 1.330998  
Cl 0.000000 0.000000 -1.330998

Cl2  
E = -920.365185  
Cl 0.000000 0.000000 1.009249  
Cl 0.000000 0.000000 -1.009249

Cl-  
E = -460.278011  
Cl 0.000000 0.000000 0.000000

C1  
E = -460.140805  
C1 0.000000 0.000000 0.000000  
  
C6C15...C1-, TS  
E = -2989.738735  
c1 -5.296965 0.808948 0.000002  
c -0.683655 0.881730 -0.000001  
c -0.889884 -0.476170 -0.000001  
c 0.268267 -1.273430 -0.000000  
c 1.539584 -0.674911 0.000000  
c 1.675575 0.721441 0.000000  
c 0.523555 1.523254 -0.000001  
c1 0.599664 3.259358 -0.000001  
c1 3.249300 1.458035 0.000001  
c1 2.961933 -1.672446 0.000001  
c1 0.116003 -3.001846 -0.000000

c1 -2.488795 -1.099785 -0.000001  
  
C6C15...C1-, LM  
E = -2989.745650  
c1 5.522358 -0.687617 -0.000326  
c1 2.578231 -0.468260 0.000317  
c 0.845663 -0.322614 0.000144  
c 0.041727 -1.431197 0.000117  
c -1.324734 -1.462925 0.000038  
c -1.990187 -0.228314 -0.000041  
c -1.233970 0.954443 -0.000020  
c 0.170838 0.912331 0.000073  
c1 -2.052209 2.487314 -0.000071  
c1 -3.727931 -0.174355 -0.000199  
c1 -2.178603 -2.981826 0.000048  
c1 1.090153 2.381782 0.000120



## References

- 1 J. R. Wiley, E. C. M. Chen, E. S. D. Chen, P. Richardson, W. R. Reed and W. E. Wentworth, The determination of absolute electron affinities of chlorobenzenes, chloronaphthalenes and chlorinated biphenyls from reduction potentials, *J. Electroanal. Chem.*, 1991, **307**, 169–182.
